# Supplementary material for: Characterization of Bubble Transport in Porous Media Using a Microfluidic Channel
Source: MDPI journal article supplement (doi:10.3390/w15061033), 2023-03-09
Supplement: s1 [file s1]

Archive with 1 entries (1 files):
- water-2224135-supplementary.pdf
